# Supplementary material for: Antimicrobial Stewardship and Its Impact on the Changing Epidemiology of Polymyxin Use in a South Indian Healthcare Setting
Source: MDPI journal article supplement (doi:10.3390/antibiotics10050470), 2021-04-21
Supplement: s1 [file s1]

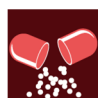**Table S1.** Amrita antimicrobial stewardship dosing guideline of polymyxin B 2018.

| Weight of the Patient (Kg)                                                     | Loading Dose          | Maintenance Dose        |
|--------------------------------------------------------------------------------|-----------------------|-------------------------|
| 50–69 Kg                                                                       | 15 Lakh units IV stat | 10 Lakh units IV q12 hr |
| 70–89 Kg                                                                       | 20 Lakh units IV stat | 10 Lakh units IV q12 hr |
| <50 Kg and > 90 Kg (Adjusted body weight should be used to calculate the dose) | 3mg/Kg/dose           | 1.5mg/Kg q12 hr         |

Loading dose is required for all patients to achieve steady state concentration rapidly. Maintenance dose should be administered 12 hours after the administration of loading dose. Since polymyxin B is eliminated through non-renal pathways and the serum concentration is not significantly affected by renal function, dosage adjustment in altered renal function is not recommended.

\*Adjusted body weight (Kg) = Ideal body weight + 0.4(Actual body weight – Ideal body weight).

## References

1. Kassamali Z, Jain R, Danziger L. An Update on the arsenal for multidrug-resistant *Acinetobacter* infections: Polymyxin antibiotics. *International Journal of Infectious Diseases*. 2015; 30:125-132.
2. Sandri A, Landersdorfer C, Jacob J, Boniatti M, Dalarosa M, Falci D, Behle T, Bordinhão R, Wang J, Forrest A, Nation R, Li J, Zavascki A. Population Pharmacokinetics of Intravenous Polymyxin B in Critically Ill Patients: Implications for Selection of Dosage Regimens. *Clinical Infectious Diseases*. 2013; 57(4):524-531.
3. Miglis C, Rhodes N, Avedissian S, Kubin C, Yin M, Nelson B, Pai M, Scheetz M. Population Pharmacokinetics of Polymyxin B in Acutely Ill Adult Patients. *Antimicrob Agents Chemother*. 2018; 62(3):e01475-17.
4. Kubin C, Nelson B, Miglis C, Scheetz M, Rhodes N, Avedissian S, Cremers S, Yin M. Population Pharmacokinetics of Intravenous Polymyxin B from Clinical Samples. *Antimicrob Agents Chemother*. 2018; 62(3):e01493-17.
5. Thamlikitkul V, Dubrovskaya Y, Manchandani P, Ngamprasertchai T, Boonyasiri A, Babic J, Tam V. Dosing and Pharmacokinetics of Polymyxin B in Patients with Renal Insufficiency. *Antimicrob Agents Chemother*. 2016; 61(1):e01337-16.

Recommendation discussed with: Dr.Vidya.P.Menon, Dr.Syam Sunder, Dr.Zubair Umer Mohammed, Dr.Sabarish.B.Nair, Dr.Merlin Moni, Dr.Dipu T.S, Infectious disease clinical pharmacists

### Amrita Antimicrobial Stewardship Dosing Guideline of Colistin 2019

Loading dose – 9MU in 100ml NS over 30minutes to 1 hour irrespective of creatinine clearance to achieve steady state plasma concentration early.

Maintenance dose needs to be initiated 12 hours after the administration of loading dose based on the following categories of creatinine clearance<sup>1,2</sup>

| Creatinine Clearance (ml/min)                                  | Maintenance Dose of Colistin                                                                                                                                                                                                                                                         |
|----------------------------------------------------------------|--------------------------------------------------------------------------------------------------------------------------------------------------------------------------------------------------------------------------------------------------------------------------------------|
| ≥80mL/min                                                      | 9MU/day i.e 3MU IV q8 hr                                                                                                                                                                                                                                                             |
| 50 to <80 mL/min                                               | 8MU/day i.e 4MU IV q12 hr                                                                                                                                                                                                                                                            |
| 30 to <50 mL/min                                               | 6MU/day i.e 3MU IV q12 hr                                                                                                                                                                                                                                                            |
| <30mL/min                                                      | 4MU/day i.e 2MU IV q12 hr                                                                                                                                                                                                                                                            |
| Non-dialysis days – 2 MU IV q12hr                              |                                                                                                                                                                                                                                                                                      |
| Dialysis days- 2MU IV q12hr and 1MU supplemental dose after HD |                                                                                                                                                                                                                                                                                      |
| Intermittent HD and Maintenance HD                             | Conduct IHD session as late as possible within the dose interval (HD to be completed before next dose) to minimize the amount of CMS and formed colistin lost to the extracorporeal system                                                                                           |
| SLED (Sustained Low Efficiency Dialysis) Approx 8-10 hrs       | 2 MU IV q12hr (i.e. 4MU/day) and supplemental dose of 0.4MU (10% of 130 mg CBA) per each hour of SLED to be given with the baseline dose. (i.e for a 10hr SLED, 8MU / day ( 4MU baseline dose and 4MU supplemental dose) can be safely and effectively administered as 4MU IV q12 hr |
| Continuous Renal Replacement Therapy                           | 13 MU per day (440mg CBA) which can be administered as 6.5 MU IV q12 hr                                                                                                                                                                                                              |

For obese patients, Ideal body weight should be used to determine the colistin dose.

## References

1. Nation RL, Garonzik SM, Li J, et al. Updated US and European Dose Recommendations for Intravenous Colistin: How Do They Perform? *Clin Infect Dis*. 2016;62(5):552-558. doi:10.1093/cid/civ964
2. Nation RL, Garonzik SM, Thamlikitkul V, et al. Dosing guidance for intravenous colistin in critically-ill patients. *Clin Infect Dis*. December 2016;ciw839. doi:10.1093/cid/ciw839
3. Tsuji BT, Forrest A, Giacobbe DR, Viscoli C, Giamarellou H, Karaiskos I. SPECIAL ARTICLE International Consensus Guidelines for the Optimal Use of the Polymyxins : doi:10.1002/phar.2209

**Table S2.** Details of empiric prescription patterns related to polymyxins involving de-escalation and continuation of the polymyxins.

| Change in Empirical Prescription Pattern | 2016–2017<br>N = 121 | 2017–2018<br>N = 52 | 2018–2019<br>N = 31 | 2019–2020<br>N = 174 |
|------------------------------------------|----------------------|---------------------|---------------------|----------------------|
| Empiric polymyxins continued             | 86(71%)              | 34(65%)             | 16(52%)             | 118(68%)             |
| Empiric polymyxins de-escalated          | 34 (28%)             | 19(36%)             | 15(48%)             | 56(32%)              |

**Table S3.** Percentage Susceptibility of Colistin.

| Percentage Susceptibility of Colistin* | <i>Klebsiella pneumoniae</i> |      |      | <i>E.coli</i> |      |      | <i>Pseudomonas aeruginosa</i> |      |      | <i>Acinetobacter baumannii</i> |      |      | <i>Enterobacter sp</i> |      |      |
|----------------------------------------|------------------------------|------|------|---------------|------|------|-------------------------------|------|------|--------------------------------|------|------|------------------------|------|------|
|                                        | 2017                         | 2018 | 2019 | 2017          | 2018 | 2019 | 2017                          | 2018 | 2019 | 2017                           | 2018 | 2019 | 2017                   | 2018 | 2019 |
|                                        | 89%                          | 90%  | 90%  | 99%           | 95%  | 100% | 100%                          | 98%  | 99%  | 98%                            | 97%  | 99%  | 87%                    | 85%  | 91%  |

\*Blood isolates.

**Table S4.** Distribution and appropriateness of co-prescribed reserved antimicrobials along with polymyxins.

| Prescription Characteristics                         | 2016–2017 | 2017–2018 | 2018–2019 | 2019–2020 |
|------------------------------------------------------|-----------|-----------|-----------|-----------|
| Number of prescriptions                              |           |           |           |           |
| CARBAPENEMS                                          | 587       | 1352      | 1582      | 2011      |
| TIGECYCLINE                                          | 96        | 105       | 71        | 166       |
| FOSFOMYCIN                                           | NA        | 25        | 29        | 17        |
| Appropriateness of co-prescribed reserve antibiotics |           |           |           |           |
| CARBAPENEMS                                          | 59%       | 63%       | 84%       | 87%       |
| TIGECYCLINE                                          | 44%       | 44%       | 89%       | 92%       |
| FOSFOMYCIN                                           | 100%      | 57%       | 95%       | 87%       |

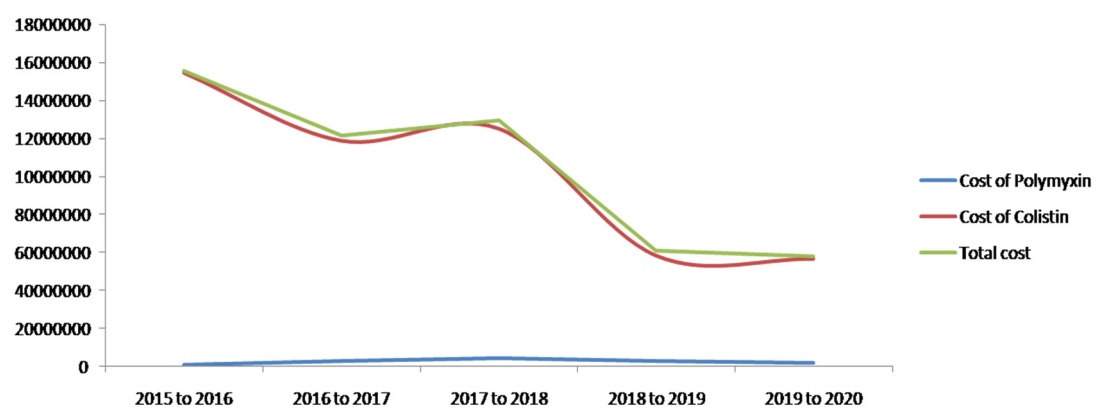

Figure S1. Cost of polymyxin consumption.
